# Supplementary material for: Modulation of E-cadherin expression promotes migration ability of esophageal cancer cells
Source: PubMed Central journal article supplement (PMC4761978; doi:10.1038/srep21713), 2016-02-22
Supplement: srep21713-s1.pdf [file srep21713-s1.pdf]

**Modulation of E-cadherin expression promotes migration ability of esophageal cancer cells**

**Running title:** Per2 compromises cell-cell junction integrity

Shujun Li<sup>1</sup>, Song Cai<sup>1</sup>, Changbao Zhai<sup>1</sup>, Xuebo Qin<sup>1</sup>, Xiaolu Wang<sup>1</sup>, Helin Zhang<sup>2</sup>

1, Department of Thoracic Surgery, the Second Affiliated Hospital, Hebei Medical University, Shijiazhuang, 050051, China. 2, Hebei Provincial Thoracic Hospital, Shijiazhuang, 050051, China.

**Corresponding author:** Dr. Xiaolu Wang, Department of Thoracic Surgery, the Second Affiliated Hospital, Hebei Medical University, Shijiazhuang, 050051, China. Email: [xiaolurwang@outlook.com](mailto:xiaolurwang@outlook.com).

Full-length pictures of gel graphs

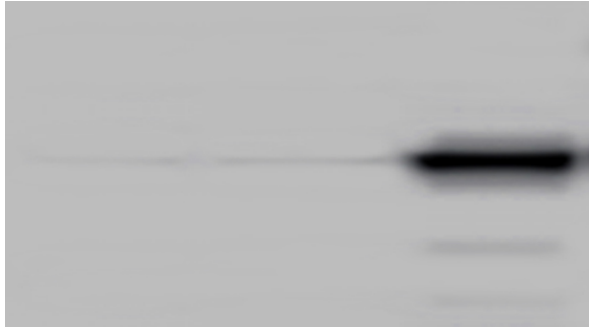

Fig.1C-Per2

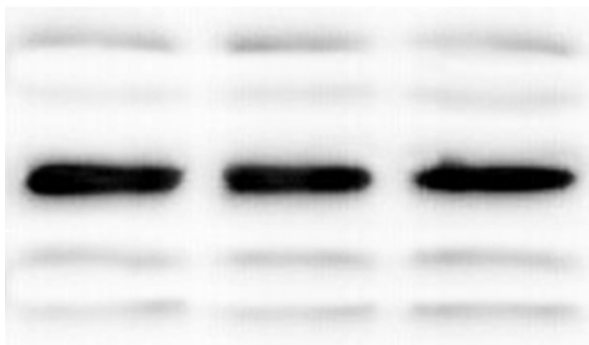

Fig.1C-beta-actin

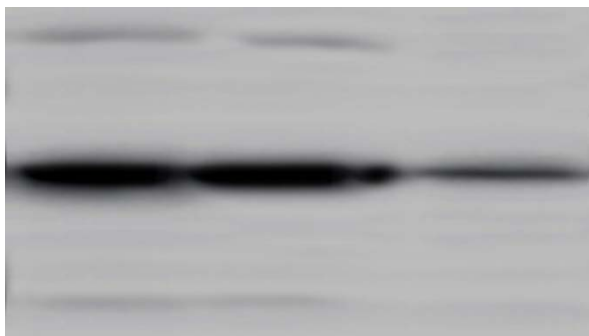

Fig.3D. EC

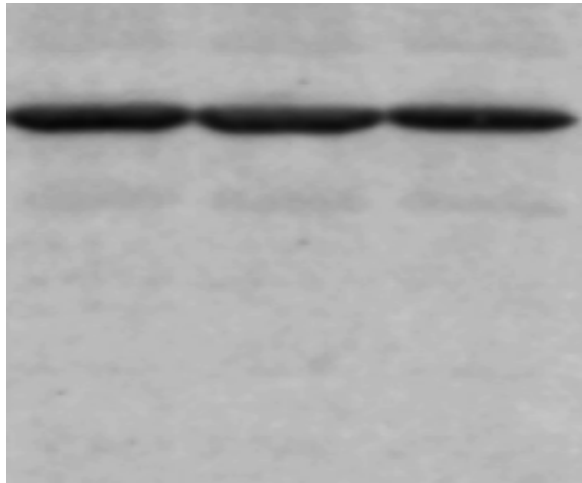

Fig.3D.beta-actin

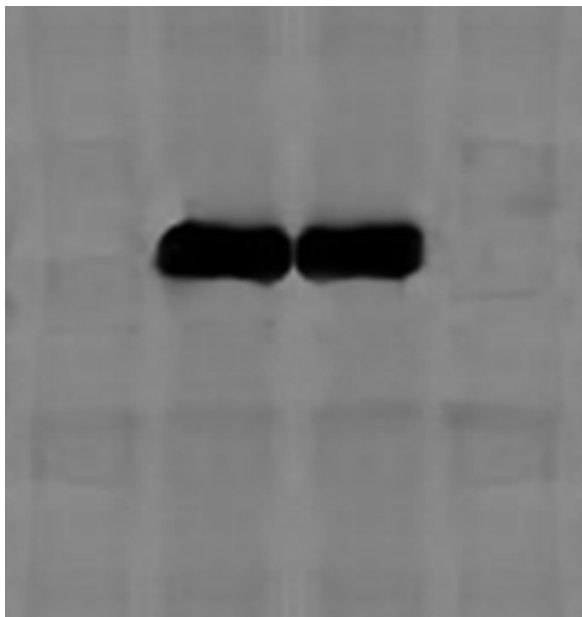

Fig.2A.Per2

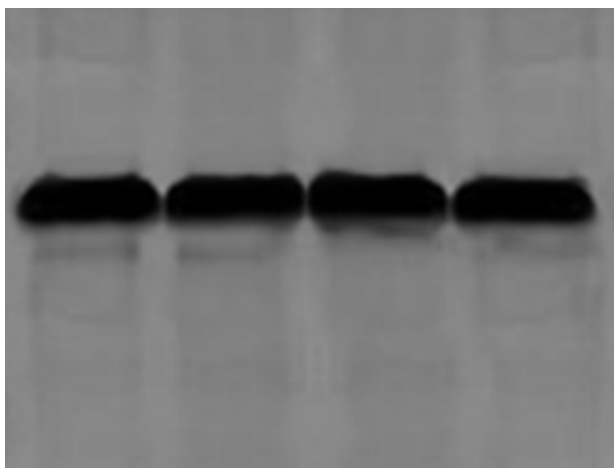

Fig.2A-beta actin

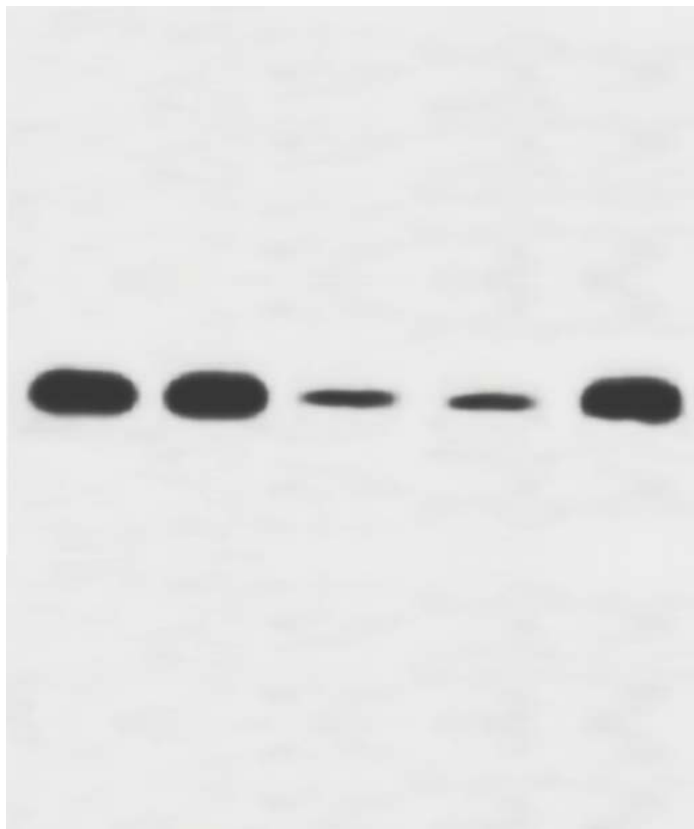

Fig.2C-EC

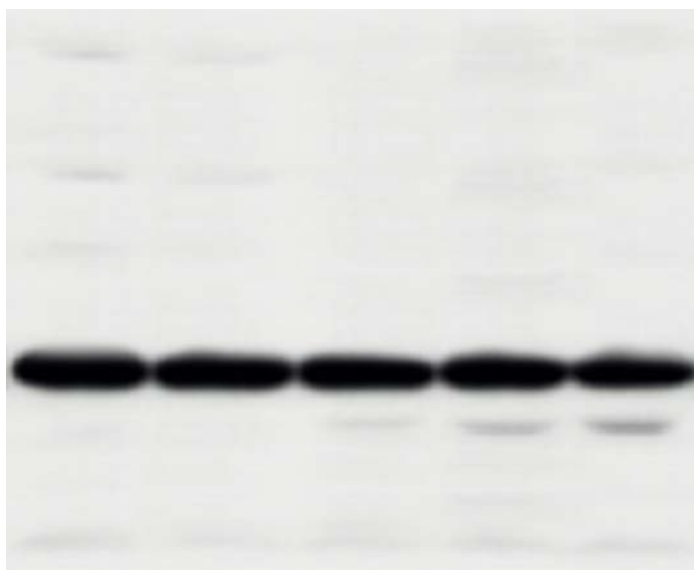

Fig.2C-beta-actin

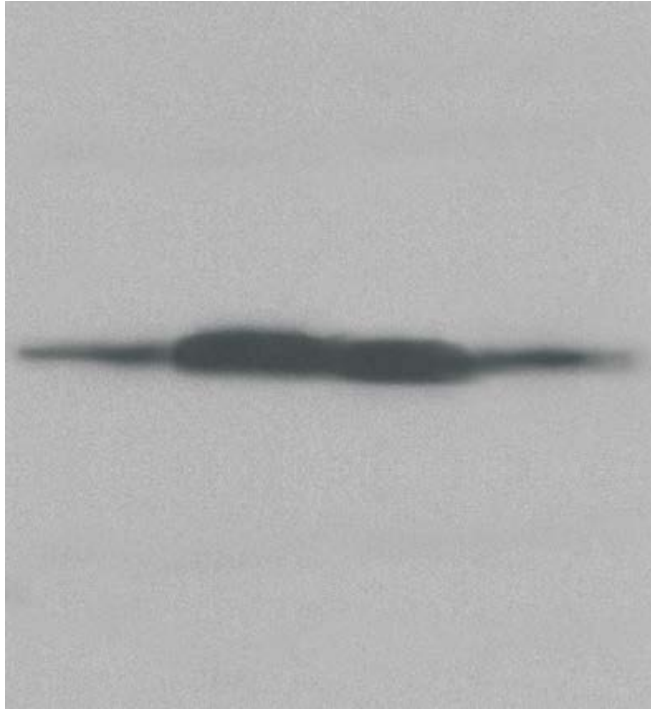

Fig3. pHDAC1

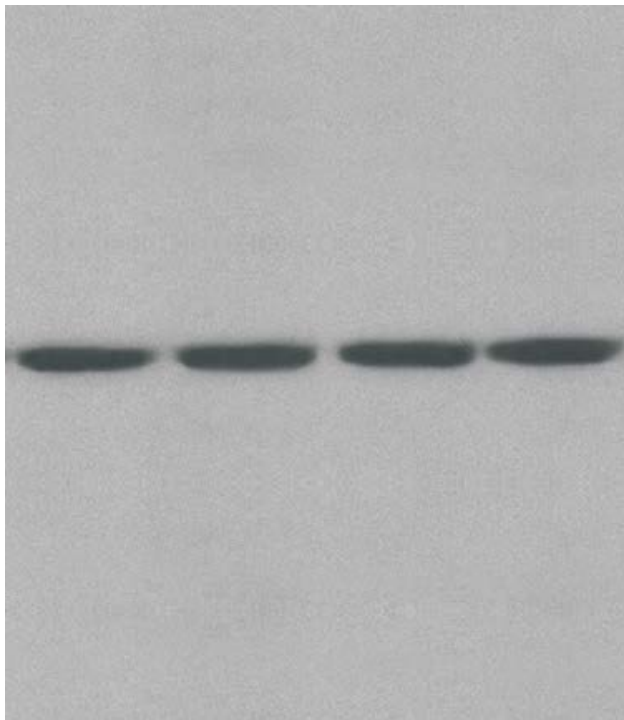

Fig.3. Beta actin

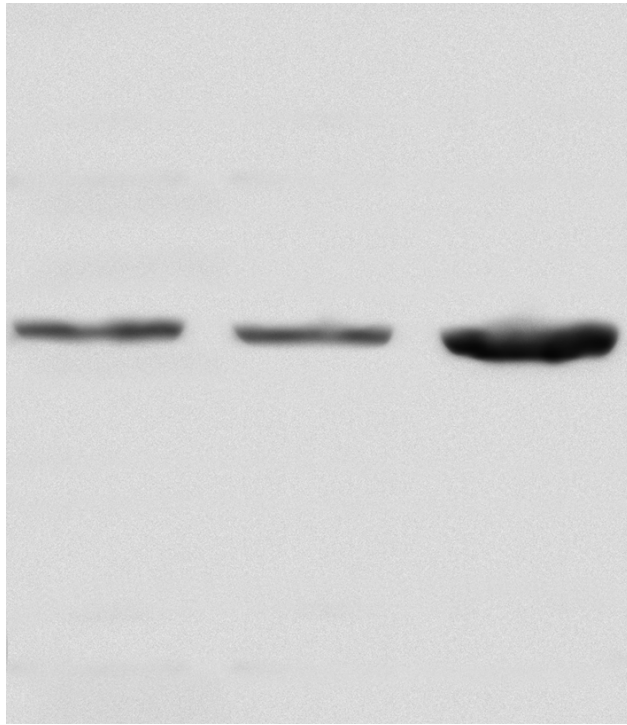

Fig. 3. pHDAC1

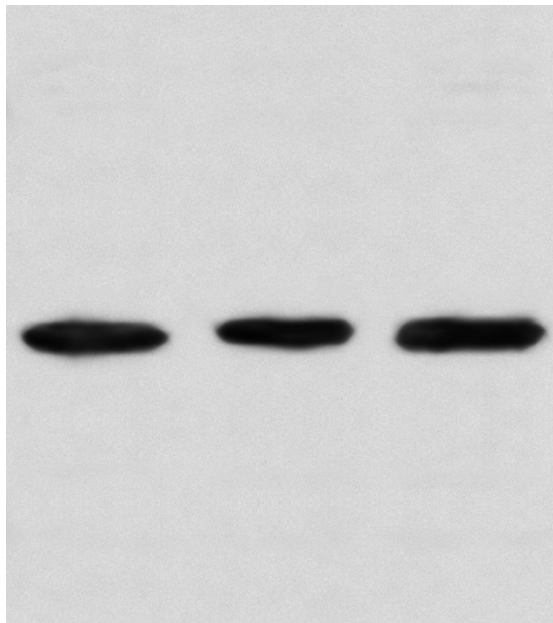

Fig. 3. Beta actin

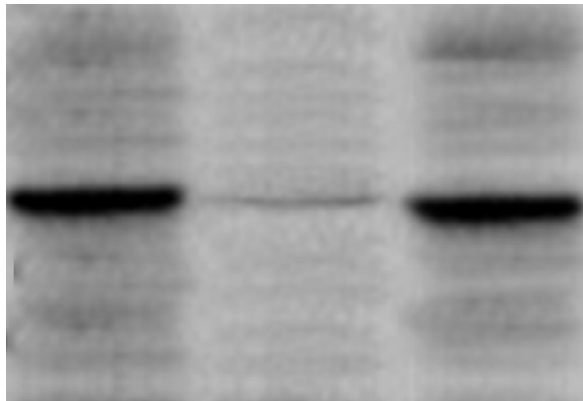

Fig5l-EC

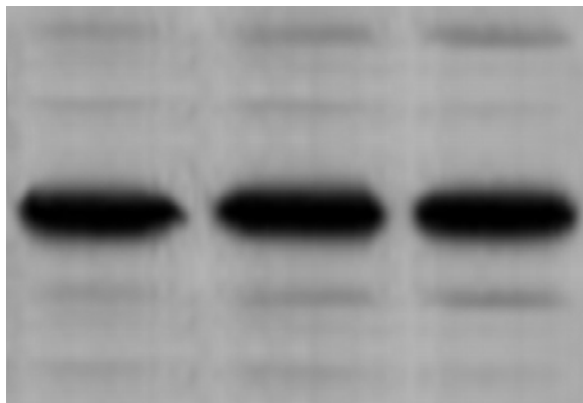

Fig5l-beta-actin
